# Supplementary material for: Antibody Titer Kinetics and SARS-CoV-2 Infections Six Months after Administration with the BNT162b2 Vaccine
Source: MDPI journal article supplement (doi:10.3390/vaccines9111357), 2021-11-19
Supplement: s1 [file s1]

**Table S1.** Demographic characteristics, serological results and COVID-19 related information of the 12 HCPs post-vaccination infected by SARS-CoV-2.

| Subject | Sex | Age (years) | Anti-RBD (BAU/mL) |                | Vaccination to infection (days) <sup>a</sup> | Symptoms                                        | Close contacts <sup>d</sup> |
|---------|-----|-------------|-------------------|----------------|----------------------------------------------|-------------------------------------------------|-----------------------------|
|         |     |             | T <sub>2</sub>    | T <sub>3</sub> |                                              |                                                 |                             |
| 1       | M   | 76          | 2122              | >2500          | 64                                           | Asymptomatic                                    | Yes                         |
| 2       | F   | 42          | >2500             | >2500          | 59                                           | Asymptomatic                                    | Yes                         |
| 3       | M   | 54          | 196               | 897            | 69                                           | Partial anosmia/ageusia                         | Yes                         |
| 4       | M   | 39          | 1866              | >2500          | N/A <sup>b</sup>                             | Asymptomatic                                    | No                          |
| 5       | F   | 57          | 2047              | >2500          | N/A <sup>b</sup>                             | Asymptomatic                                    | No                          |
| 6       | F   | 55          | >2500             | >2500          | <0 <sup>c</sup>                              | Asymptomatic                                    | No                          |
| 7       | F   | 49          | >2500             | >2500          | 67                                           | Partial anosmia/ageusia, cold, generalized pain | Yes                         |
| 8       | M   | 53          | 339               | >2500          | 84                                           | Asymptomatic                                    | No                          |
| 9       | F   | 42          | 1131              | >2500          | 42                                           | Asymptomatic                                    | Yes                         |
| 10      | F   | 55          | 2046              | >2500          | 99                                           | Partial anosmia/ageusia, cold                   | Yes                         |
| 11      | F   | 42          | >2500             | 2495           | 14                                           | Partial anosmia/ageusia, cold                   | Yes                         |
| 12      | F   | 56          | 1066              | 714            | 7                                            | Asymptomatic                                    | Yes                         |

<sup>a</sup>Intervals are calculated from the day of the 2<sup>nd</sup> dose to the day of the first positive RT-PCR test.

<sup>b</sup>COVID-19 was asymptomatic and the HCPs found out about the infection only through the serological test at T<sub>3</sub>

<sup>c</sup>Positivity was discovered by an occasional anti-N test performed at T<sub>1</sub>

<sup>d</sup>“Close contacts” refers to the presence of a SARS-CoV-2 positive unvaccinated household at the time of infection.

**Table S2.** Antibody titers at T<sub>0</sub>, T<sub>1</sub>, T<sub>2</sub> and T<sub>3</sub> of the 48 HCPs selected for neutralization activity tests. Time intervals between blood withdrawal and the first vaccine dose are reported as well as Seronegativity/positivity at T<sub>0</sub>. Data have been color coded according to the anti-RBD titer at T<sub>1</sub> (dark blue, >2500 U/mL; blue, 2500 - 500 U/mL; light blue, 500 – 50 U/mL; dark grey 50 - 10 U/mL; light gray 10 - 1 U/mL, white < 1 U/mL).

| N<br>° | COVID-<br>19 | Test results (U/mL) |       |       |       | Time intervals (days) |       |       |
|--------|--------------|---------------------|-------|-------|-------|-----------------------|-------|-------|
|        |              | T0                  | T1    | T2    | T3    | T0-T1                 | T0-T2 | T0-T3 |
| 1      | positive     | 686                 | 19280 | 52450 | 7950  | 22                    | 43    | 177   |
| 2      | positive     | 59.8                | 26440 | 21550 | 3630  | 21                    | 46    | 185   |
| 3      | positive     | 4.61                | 3708  | 8600  | 965   | 21                    | 43    | 187   |
| 4      | positive     | 17.1                | 22200 | 25250 | 2048  | 21                    | 43    | 187   |
| 5      | positive     | 26.5                | 10480 | 70900 | 5470  | 22                    | 43    | 186   |
| 6      | positive     | 6.46                | 13000 | 10700 | 1217  | 21                    | 42    | 175   |
| 7      | positive     | 108                 | 89880 | 67900 | 17760 | 20                    | 42    | 187   |
| 8      | positive     | 72.9                | 11960 | 20800 | 2213  | 21                    | 42    | 172   |
| 9      | positive     | 58.3                | 1621  | 5600  | 1308  | 21                    | 42    | 187   |
| 10     | negative     | 0                   | 1282  | 7060  | 290   | 22                    | 43    | 188   |
| 11     | negative     | 0                   | 972   | 3160  | 212   | 22                    | 40    | 183   |
| 12     | negative     | 0                   | 810   | 6760  | 1036  | 21                    | 42    | 189   |
| 13     | negative     | 0                   | 749   | 4220  | 591   | 22                    | 43    | 186   |
| 14     | negative     | 0                   | 702   | 3820  | 513   | 22                    | 43    | 187   |
| 15     | positive     | 0                   | 673   | 3500  | 590   | 21                    | 42    | 179   |
| 16     | negative     | 0                   | 610   | 8820  | 1693  | 21                    | 41    | 187   |
| 17     | negative     | 0                   | 455   | 7660  | 1372  | 21                    | 42    | 190   |
| 18     | negative     | 0                   | 314   | 10680 | 3750  | 22                    | 43    | 187   |
| 19     | negative     | 0                   | 270   | 3720  | 1485  | 21                    | 41    | 175   |
| 20     | negative     | 0                   | 212   | 6420  | 2447  | 21                    | 41    | 178   |
| 21     | negative     | 0                   | 179   | 2493  | 1579  | 21                    | 46    | 177   |
| 22     | negative     | 0                   | 131   | 6980  | 1757  | 21                    | 42    | 175   |
| 23     | negative     | 0                   | 90.7  | 1467  | 437   | 21                    | 42    | 178   |
| 24     | negative     | 0                   | 60.7  | 4280  | 1379  | 21                    | 42    | 179   |
| 25     | negative     | 0                   | 48.7  | 1357  | 380   | 21                    | 43    | 183   |
| 26     | negative     | 0                   | 42.5  | 3800  | 1022  | 21                    | 42    | 187   |
| 27     | negative     | 0                   | 36.2  | 2480  | 1206  | 21                    | 41    | 185   |
| 28     | negative     | 0                   | 30.3  | 829   | 361   | 21                    | 42    | 187   |
| 29     | negative     | 0                   | 25.5  | 893   | 701   | 21                    | 42    | 172   |
| 30     | negative     | 0                   | 20    | 4600  | 715   | 21                    | 45    | 180   |
| 31     | negative     | 0                   | 15.3  | 452   | 332   | 22                    | 43    | 177   |

|    |          |   |      |      |      |    |    |     |
|----|----------|---|------|------|------|----|----|-----|
| 32 | negative | 0 | 11.4 | 1715 | 825  | 23 | 44 | 183 |
| 33 | negative | 0 | 9.74 | 1326 | 942  | 21 | 42 | 186 |
| 34 | negative | 0 | 9.64 | 1357 | 328  | 23 | 45 | 185 |
| 35 | negative | 0 | 8.14 | 639  | 417  | 22 | 43 | 187 |
| 36 | negative | 0 | 6.88 | 671  | 188  | 21 | 43 | 190 |
| 37 | negative | 0 | 5.7  | 567  | 75.9 | 21 | 42 | 177 |
| 38 | negative | 0 | 4.51 | 701  | 187  | 21 | 42 | 189 |
| 39 | negative | 0 | 3.22 | 365  | 220  | 21 | 42 | 175 |
| 40 | negative | 0 | 2.05 | 1427 | 265  | 22 | 43 | 188 |
| 41 | negative | 0 | 0.99 | 386  | 409  | 20 | 41 | 176 |
| 42 | negative | 0 | 0.68 | 375  | 199  | 21 | 41 | 175 |
| 43 | negative | 0 | 0.57 | 483  | 226  | 21 | 39 | 180 |
| 44 | negative | 0 | 0.44 | 110  | 5160 | 21 | 46 | 183 |
| 45 | negative | 0 | 0.4  | 21.8 | 24.7 | 21 | 42 | 187 |
| 46 | negative | 0 | 0.4  | 66.5 | 169  | 22 | 40 | 185 |
| 47 | negative | 0 | 0.4  | 257  | 167  | 21 | 42 | 172 |
| 48 | negative | 0 | 0.4  | 0.4  | 9.1  | 21 | 42 | 182 |

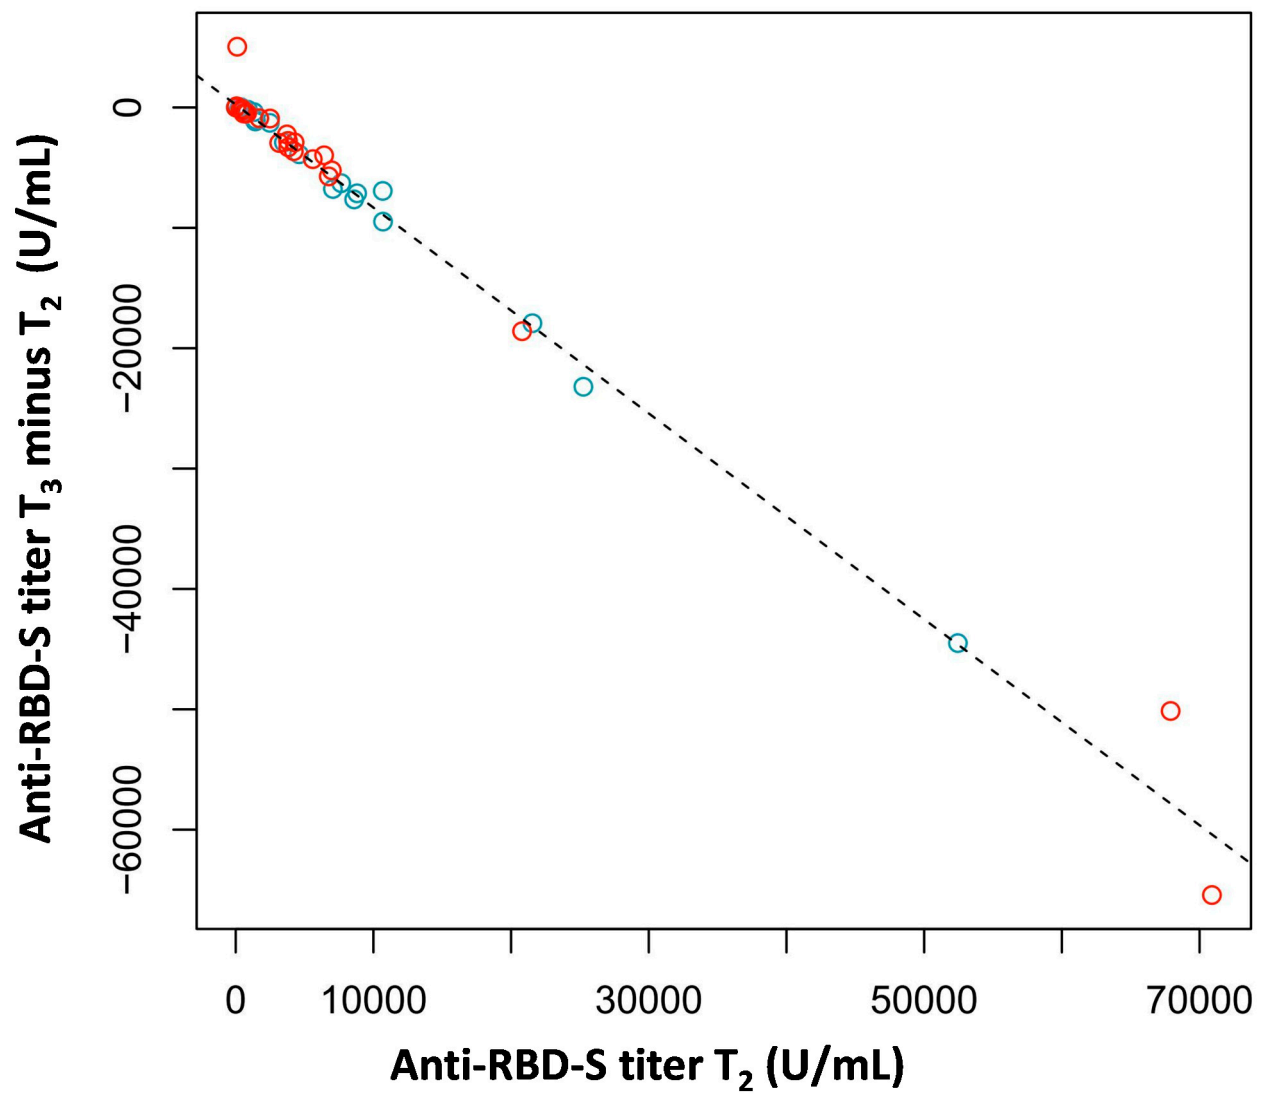

**Figure S1.** Association between antibody titer peak at  $T_2$  versus  $T_3$  minus  $T_2$  variation in the 48 samples described in section 3.7. Dashed line represents the robust linear regression analysis. Red dots: females; blue dots: males.

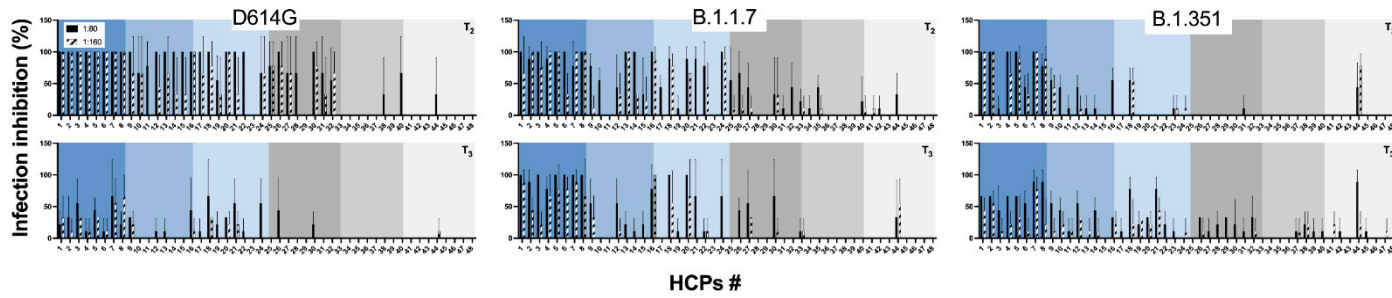

**Figure S2.** Neutralization assay. Neutralizing activity was assessed using two sera dilutions (1:80 and 1:160) against 0.01 MOI of three SARS-CoV-2 variants: D614G, B.1.1.7, B.1.351. Mean values + SD are reported, each condition was tested in triplicate. Sera are ordered according to the anti-RBD titer at T<sub>1</sub>: dark blue, >2500 U/mL; blue, 2500 - 500 U/mL; light blue, 500 – 50 U/mL; dark grey 50 - 10 U/mL; light gray 10 - 1 U/mL, white < 1 U/mL.
